# Supplementary material for: A Targeted Gene Panel for Circulating Tumor DNA Sequencing in Neuroblastoma
Source: PubMed Central journal article supplement (PMC7769379; doi:10.3389/fonc.2020.596191), 2020-12-14

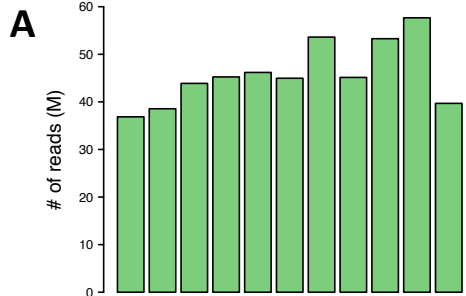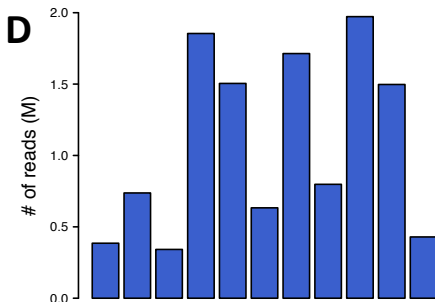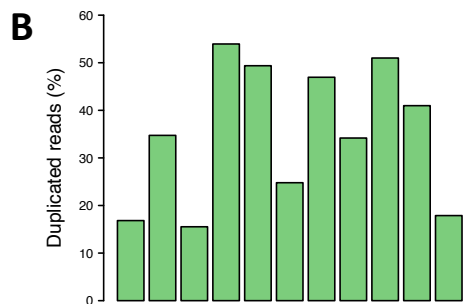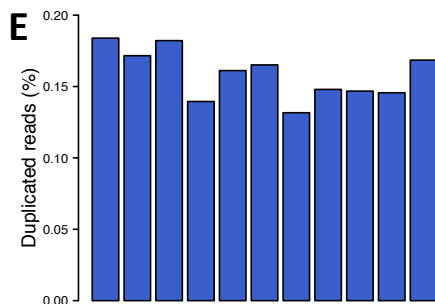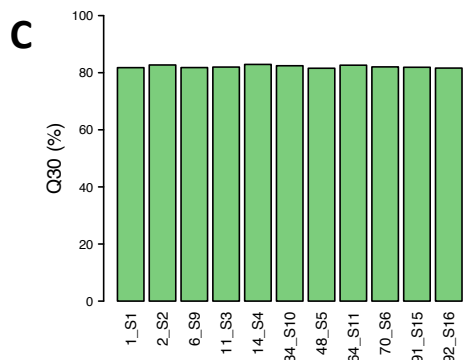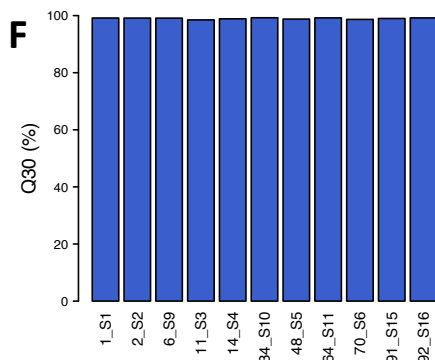

Supplement: Image_1.pdf [file Image_1.pdf]
